## Population scale nucleic acid delivery to *Caenorhabditis elegans* via electroporation

Anastasia S. Khodakova<sup>1,2</sup>, Daniela Vidal Vilchis<sup>1</sup>, Ferdinand Amanor<sup>2</sup>, Buck S. Samuel<sup>1,2</sup>

<sup>1</sup>*Alkek Center for Metagenomics and Microbiome Research and Department of Molecular Virology and Microbiology, Baylor College of Medicine, Houston TX USA*

<sup>2</sup>*SMART Program, Baylor College of Medicine, Houston TX USA*

1 Short running title: Population scale electroporation of *C.elegans*

2

3 Keywords: *C. elegans*, nucleic acid delivery, electroporation, genetics

4

5 Corresponding authors details: Buck S. Samuel

6 *Alkek Center for Metagenomics and Microbiome Research, Baylor College of Medicine*

7 *1 Baylor Plaza, MS:385, Houston, Texas 77030, United States*

8 *Tel +1 7137989110. Email: Buck.Samuel@bcm.edu*

9

## ABSTRACT

10 The free-living nematode *C.elegans* remains one of the most robust and flexible genetic systems for inter-  
11 rogating the complexities of animal biology. Targeted genetic manipulations, such as RNA interference (RNAi),  
12 CRISPR/Cas9- or array-based transgenesis, all depend on initial delivery of nucleic acids. Delivery of dsRNA  
13 by feeding can be effective, but expression in *E. coli* is not conducive to experiments intended to remain sterile  
14 or with defined microbial communities. Soaking-based delivery requires prolonged exposure of animals to high  
15 material concentrations without a food source and is of limited throughput. Last, microinjection of individual an-  
16 imals can precisely deliver materials to animals' germlines, but is limited by the need to target and inject each  
17 animal one-by-one. Thus, we sought to address some of these challenges in nucleic acid delivery by develop-  
18 ing a population-scale delivery method. We demonstrate efficient electroporation-mediated delivery of dsRNA  
19 throughout the worm and effective RNAi-based silencing, including in the germline. Finally, we show that guide  
20 RNA delivered by electroporation can be utilized by transgenic Cas9 expressing worms for population-scale ge-  
21 netic targeting. Together, these methods expand the scale and scope of genetic methodologies that can be  
22 applied to the *C.elegans* system.

23

## INTRODUCTION

24 Understanding gene function is an essential task of modern biology. The nematode *Caenorhabditis ele-*  
25 *gans* is one of the most widely used and versatile animal models for studying nearly all aspects of animal  
26 biology [Corsi et al. 2015, Meneely et al. 2019]. For many years *C.elegans* has proven to be an effective and  
27 powerful genetically tractable system for functional characterization of genes in a whole organismal context  
28 [Housden et al. 2017]. First, *C.elegans* allows for a rapid analysis of gene function carried out via targeted RNA  
29 interference (RNAi)-based knock-down of gene expression [Timmons and Fire 1998, Conte et al. 2015]. Sec-  
30 ond, transgenic animals bearing exogenous genes can be created via microinjection of DNA constructs into the  
31 animal's gonad resulting in the formation of heritable extrachromosomal arrays [Berkowitz et al. 2008]. Third,  
32 CRISPR/Cas9 genome editing tools have been developed for precise genomic manipulations that allow desired  
33 *C.elegans* mutants to be engineered [Dickinson and Goldstein 2016]. One of the critical steps for every genome  
34 manipulation pipeline is the delivery of nucleic acids inside the cell or animal. For *C.elegans*, microinjection of  
35 individual worms is a crucial step in the delivery of exogenous material. Microinjection remains the most time-  
36 and labor-intensive procedure for most *C.elegans* laboratories, whereas many other methods and approaches  
37 have been developed for different cellular and organismal systems [Alsaggar and Liu 2015]. Among others, elec-  
38 troporation has been recognized as a powerful and quick method for simultaneous nucleic acid transfer in large  
39 populations of bacterial, yeast and mammalian cells [Young and Dean 2015]. The electric pulse applied to the cell  
40 destabilizes its membrane and causes formation of transient pores allowing exogenous material such as DNA,  
41 RNA, and proteins to enter the cell. Electroporation can also be used for introduction of exogenous material  
42 into entire tissues of the whole organism - e.g., electroporation of DNA in zebrafish [Kera et al. 2010], *Xeno-*  
43 *pus* [Haas et al. 2002], or silkworms [Ando and Fujiwara 2013]. However, this delivery method has not yet been  
44 applied to *C.elegans* animals. In this study, we demonstrate the feasibility and potential of the electroporation-  
45 based delivery of nucleic acids in *C.elegans* at a population scale. We show that electroporation-based delivery  
46 of double stranded RNA (dsRNA) triggers RNAi gene silencing pathways inside *C.elegans*. This protocol is ac-  
47 complished at the scale of hundreds of animals, making it broadly applicable and useful for nucleic acids delivery.  
48 Finally, we show in proof-of-principle studies that electroporation-mediated delivery of single-stranded guide RNA  
49 (gRNA) molecules can be utilized to disrupt genes in the progeny of Cas9 expressing animals. Together, we an-  
50 ticipate electroporation-based methods to greatly enhance the scope and scale of genetic targeting in this already  
51 robust genetic system.

52

## MATERIALS AND METHODS

53 **Worm strains and maintenance.** All strains were cultured on Nematode Growth Medium (NGM) plates seeded  
54 with *Escherichia coli* strain OP50 at 20°C. Mutant strains VC1119 [*dyf-2&ZK520.2(gk505) III*] (referred as [*sid-*  
55 *2(gk505) III*] in current study) and HC196 [*sid-1(qt9) V*] were obtained from the Caenorhabditis Genetic Center.  
56 Transgenic GR1403 [*Is(sur-5::gfp) I; eri-1(mg366) IV*] strain was a kind gift from Gary Ruvkun. The BIG0105  
57 [*Is(sur-5::gfp) I*] strain was produced by crossing GR1403 with the Samuel lab stock of N2. Strains BIG0106 [*sid-*  
58 *1(qt9) V; Is(sur-5::gfp) I*] and BIG0107 [*sid-2(gk505) III; Is(sur-5::gfp) I*] were generated by crossing of HC196  
59 and VC1119 mutants with BIG0105 strain. Transgenic strain EG9888 that stably expresses Cas9 in the germlines  
60 of animals was kindly gifted by Dr. Matthew Schwartz and Dr. Erik Jorgensen [*W01A8.6(oxTi—[Pmex-5::cas9(+*  
61 *smu-2 introns), Phsp-16.41::Cre, Pmyo-2::2xNLS-CyOFP + lox2272]]*]. A complete list of worm strains used and  
62 prepared in this study can be found in **Table S1**.

63 **Synchronization.** Nematodes were synchronized by bleaching and allowed to hatch overnight in M9 buffer  
64 [Stiernagle 2006]. Density of synchronized L1 larvae population was then measured.

65 **Production of dsRNA.** PCR products corresponding to *gfp*, *dpy-13*, *nhr-23* and *pos-1* genes were generated  
66 with T7 primer (5'-AATACGACTCACTATAG-3') and vectors isolated from the RNAi *E.coli* clones, using the fol-  
67 lowing cycling conditions: 98°C 15 sec, 55°C 15 sec, 72°C 60 sec for 30 cycles. PCR product purification  
68 was performed according to manufacturer's protocol with QIAquick PCR Purification Kit (Qiagen). Purified PCR  
69 products were then used as templates for in vitro transcription per AmpliScribe T7 High Yield Transcription Kit  
70 (Epicentre Technologies) specifications to obtain dsRNAs.

71 **Production of guide RNA.** Production of the short gRNA (100 nt in length) specific to *dpy-10* gene  
72 was performed according to the protocol described in [Hwang et al. 2013]. In brief, a plasmid encoding  
73 gRNA (targeting *dpy-10*) was constructed as follows: pDR274 vector [Addgene plasmid 42250] for in vitro  
74 gRNA production containing a T7 promoter upstream of gRNA scaffold sequence was digested with BsaI  
75 enzyme (NEB). It was then used as a backbone for cloning the annealed oligonucleotides (*dpy-10T*: 5'-  
76 TAGGGCTACCATAGGCACCACGAG-3'; *dpy-10B*: 5'-AAACCTCGTGGTGCCTATGGTAGC-3'), containing *dpy-10*  
77 protospacer sequence (5'-GCTCGTGGTGCCTATGGTAG-3'). The sequence verified expression vector was then  
78 digested with HindIII enzyme (NEB) and used as a template for in-vitro transcription of gRNA by AmpliScribe T7  
79 High Yield Transcription Kit (Epicentre Technologies).

80 **Electroporation of L1 worms with dsRNA.** An aliquot of the synchronized worms of measured density was  
81 spun down at 500 rcf for 2 min to provide approximately 250 worms (unless otherwise specified) in volume of  
82 5  $\mu$ L after the centrifugation. Then 5  $\mu$ L of worms were mixed with 40  $\mu$ L of electroporation buffer (Gene Pulser  
83 Electroporation buffer, Biorad) in 1.5 mL tubes, and allowed to incubate on ice for 5 min. An aliquot of 5  $\mu$ L

84 of purified dsRNA (10  $\mu\text{g}/\mu\text{L}$ ) was added to the worms just before the electroporation, mixed by pipetting, and  
85 transferred to 0.2 cm electroporation cuvettes (Biorad). Animals were electroporated at 300 V for 10 ms (unless  
86 otherwise specified) by square-wave single pulse using a Bio-Rad Gene Pulser (BioRad). Immediately after  
87 the electroporation, worms were washed with 1 mL of pre-chilled M9 buffer, transferred into 1.5 mL tubes and  
88 centrifuged for 2 min at 500 rcf. Supernatants were discarded and animals were then transferred to *E.coli* OP50  
89 seeded plates and cultured for 48 hours at 20°C.

90 **Electroporation of L4 and Young Adult animals.** Synchronized L1 larvae worms were cultured on OP50 plates  
91 until L4 (55 hrs) or Young Adult (70 hrs) stage at 20°C. Then worms were washed off the plate with M9 buffer,  
92 followed by two additional washes in the same buffer to eliminate bacteria. Electroporation procedure for L4/YA  
93 worms was performed the same way as described for L1 worms. After the electroporation worms were allowed  
94 to recover and lay eggs on OP50 plates for 24 hours and then removed. Progeny development was monitored for  
95 48 hours (unless otherwise specified) and worms were imaged.

96 **Image acquisition and analysis.** Microscopy-based analyses were used to count animals, measure body size  
97 and GFP fluorescence intensity. For imaging, worms were washed off the OP50 lawn with M9 buffer containing  
98 20 mM of  $\text{NaN}_3$ , washed with the same buffer two times to remove bacteria and then transferred to wells of a  
99 96-well plate or glass slide with a 2% agarose pad. Animals were imaged using the Eclipse Ti-5 fluorescence  
100 microscope (Nikon) with 4 $\times$  and 10 $\times$  and 20 $\times$  magnification under non-saturating conditions. Analysis of imaging  
101 data was performed using Fiji software [Schindelin et al. 2012] and custom written MATLAB (Mathworks) scripts  
102 (**File S1**). A minimum of 50 animals were analyzed per group for worm body length measurement and GFP  
103 fluorescence (unless otherwise specified). Worm GFP fluorescence were calculated by dividing the sum of GFP  
104 intensities of all pixels over the total pixel number for each worm. Then the background fluorescence, calculated  
105 as average fluorescence intensity of all pixels in a region without worm, was subtracted from worm fluorescence.  
106 GFP fluorescence per worm is defined in arbitrary units (a.u.). Time-lapse bright field images of live worms with  
107 Dumply and Roller phenotypes were used to create .mp4 video files of the worm's movement (**File S2**).

108 **Genotyping and Illumina sequencing.** Genotyping of generated BIG0106 [*sid-1(qt9) V; ls(sur-5::gfp) I*] and  
109 BIG0107 [*sid-2(gk505) III; ls(sur-5::gfp) I*] transgenic strains was performed using single worms PCR and primers  
110 listed in **Table S2** followed by Sanger sequencing confirmation of generated PCR products. In order to identify  
111 presence of CRISPR editing in *dpy-10* gene after the gRNA electroporation, single worm PCR products were  
112 analyzed by Illumina sequencing using 2 $\times$ 250 bp pair-end run. Primers were designed to generate 450 bp PCR  
113 product with gRNA target sequence located in the middle of the amplicon. Worms were lysed in DNA Quick  
114 Lysate (Epicentre Technologies) for 1 hour at 60°C and the lysate was then used as a template for PCR with Q5  
115 Hot Start High-Fidelity DNA Polymerase (NEB). PCR products were purified using QIAquick PCR Purification Kit  
116 (Qiagen). Barcoded libraries production and Illumina sequencing run were provided by GENEWIZ. Two FASTQ

117 files (R1 and R2) were generated for each sample (**File S3**), and subsequently analyzed using Cas-Analyzer  
118 online tool [Park 2017].

119 **Statistical analysis.** Comparison of multiple groups was performed using the analysis of variance (ANOVA) with  
120 Bonferroni correction. P - values < 0.05 were considered statistically significant. All experiments were performed  
121 at least two independent times.

122 **Data availability.** All *C. elegans* strains, primers and plasmids described in this study are available upon request.  
123 Raw data, scripts used for analyses and sequencing datasets can be found in supplementary files deposited on  
124 Figshare.

## 125 RESULTS

126 **Initial considerations in development of an electroporation pipeline for *C.elegans*.** Based on applications  
127 in other systems, we first established a reliable and robust pipeline for electroporation of *C.elegans* (outlined in  
128 **Figure 1a**) that could serve as a basis for further optimization. Briefly, one part of the worm suspension with  
129 desired number of worms is mixed with one part of the nucleic acid solution and eight parts of the electroporation  
130 buffer on ice to preserve the integrity of nucleic acids. The mixture then is transferred into the cuvette and  
131 electroporated under desired conditions. In current study we electroporated worms in 50  $\mu$ L of final solution. In  
132 total, the electroporation procedure was rapid (15 min) and tolerated by the animals.

133 **Optimization of electroporation conditions for nucleic acids delivery while preserving animal viability.**  
134 The efficiency of *in vivo* electroporation as a delivery tool is represented by an intersection of two key metrics:  
135 (1) maximum viability of worms under applied electroporation conditions and (2) the degree of material delivery  
136 itself. During electroporation, an electrical pulse is applied across the animal's body with the assumption that  
137 some tissues may be more impacted than others. The cuticle, a multi-layered collagen outer tissue akin to our  
138 skin, provides considerable protection for the worm's body and is likely to be a strong barrier for the electric pulses  
139 to bridge. To address these challenges, we sought to identify optimal electroporation parameters, in particular  
140 - pulse voltage and pulse length, that minimize adverse effects on worm physiology and maximize potential for  
141 nucleic acid delivery. These parameters were tested pairwise across a range of conditions for their impact on  
142 survival and developmental rates on populations of L1 synchronized N2 animals (~250). Microscopy-mediated  
143 worms' assessment was performed after 48 hrs of recovery on *E. coli* lawns. Robust animal viability was ob-  
144 served (> 70%) at lower voltages (100-200 V) regardless of the pulse duration, and up to 10 ms pulses for  
145 300 V treatments (**Figure 1b**). Beyond these conditions, treatment of worms at or above 300 V for longer than  
146 20 ms significantly decreased animal survival rates (**Figure 1b**). Based on measurements of animal length and  
147 vulval morphology, similar combinations of high voltage and long duration of the electric pulse caused significant

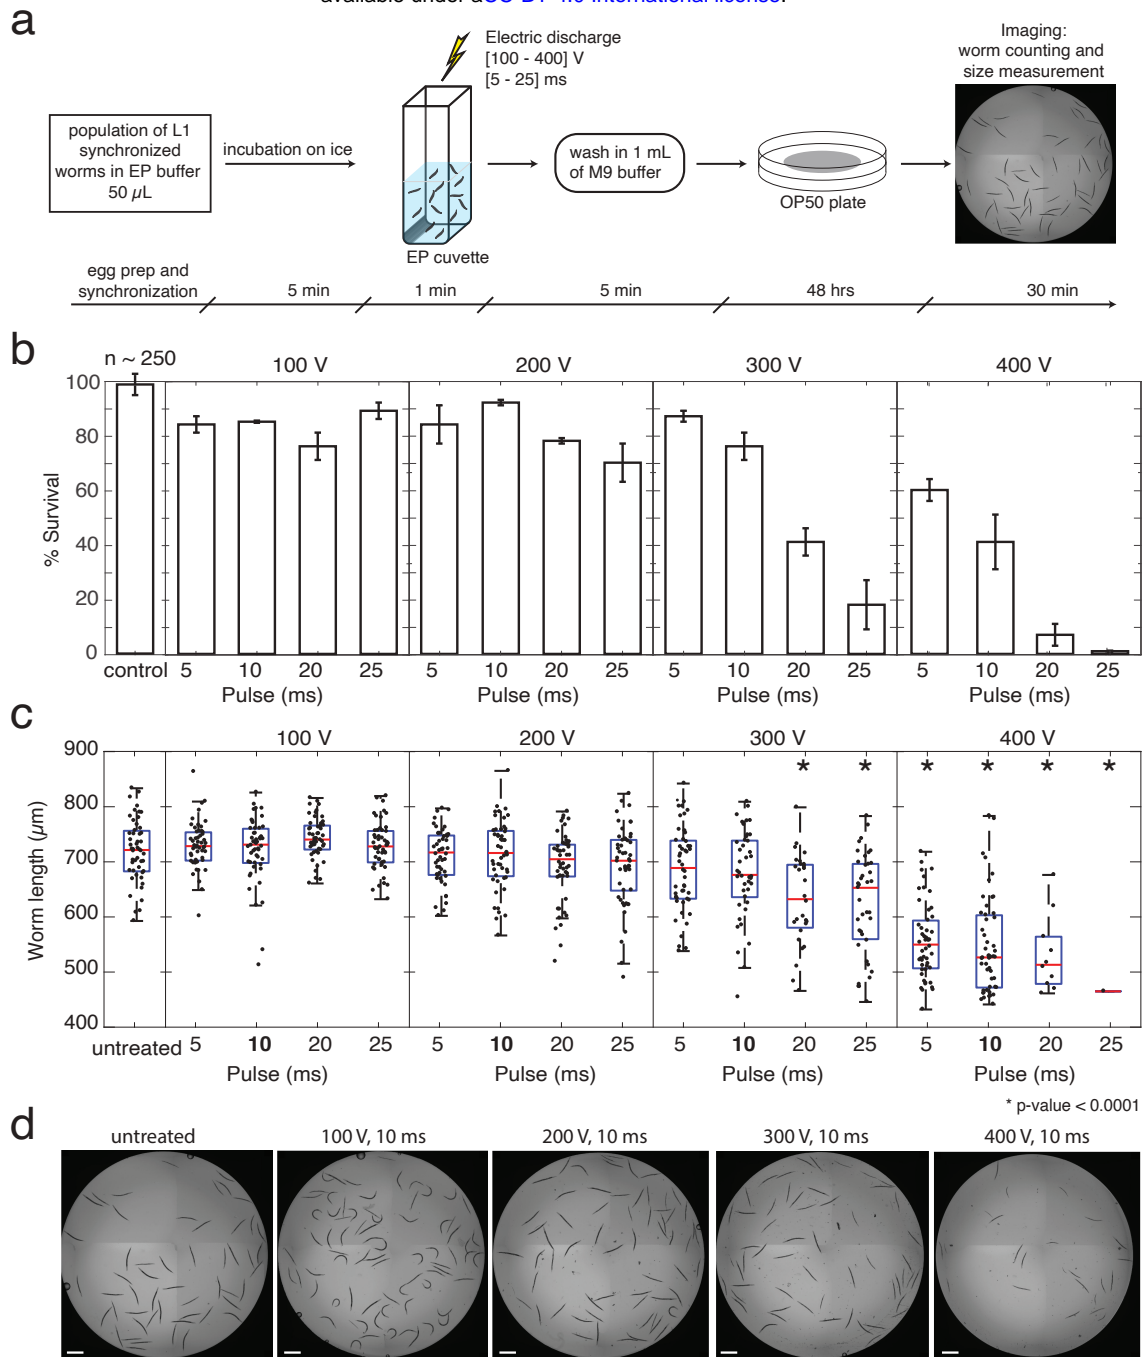

**Figure 1: Optimization of electroporation conditions for *C.elegans* viability.** General pipeline (**a**) of the electroporation procedure starts with the preparation of L1 synchronized worms (~250), which are then mixed with electroporation buffer 80% in chilled cuvettes. After electroporation, worms are washed with 1 mL of M9 buffer and collected by centrifugation at 500 rcf for 2 min, then transferred to *E.coli* OP50 seeded plates to grow for 48 hours at 20°C. Animal survival rates (**b**) and body lengths (**c**) varied based on the electroporation conditions applied. The evaluation was performed using N2 animals for each pair of electroporation parameters with an electroporation pulse duration ranging from 5 to 25 ms and voltage ranging from 100 to 400 V. Animals placed in electroporation buffer without electric discharge were used as "untreated" controls. Worm survival rates: mean  $\pm$  SD (standard deviation)% of two independent experiments. Body length measurements: red lines indicate means, blue boxes show 25<sup>th</sup> and 75<sup>th</sup> percentiles, whiskers show the data distribution range. \*P - values < 0.05 were considered statistically significant (ANOVA test with Bonferroni correction). Representative images (**d**) of worm populations exposed to electric discharges of different voltages (10 ms pulses) demonstrate the pronounced effect of the electroporation procedure on animal viability. Scale bar = 500  $\mu$ m.

148 developmental delays in electroporated worms compared to the untreated control animals (**Figure 1c-d**). Fecun-  
149 dity rates of electroporated L1 worm populations under favorable conditions (at or below 300 V and 10 ms) also  
150 appeared to be similar to untreated controls (data not shown). Thus, treatment of worms with 300 V for pulse  
151 durations up to 10 ms minimizes adverse effects on animal viability and developmental timing while maximizes  
152 potential for material delivery. As we were also interested in the delivery of nucleic acids to the germlines, we  
153 performed similar optimization of electroporation parameters on L4 animals (N2) that are closer to reproductive  
154 maturity. Using the same matrix of voltage and pulse duration times as for L1 animals before, favorable viabilities  
155 remained >70% up to 400 V 10 ms (**Table S3**). Despite the apparent resilience in L4 animals from a viability  
156 perspective, we observed a collapse of one or more of the gonads in up to ~15% of the cases starting from 300 V  
157 and 20 ms and onward, and as a consequence, a decrease in fecundity rate (data not shown).

158 **Evaluation of the effectiveness of electroporation of dsRNA in *C.elegans* populations.** Silencing by RNAi  
159 in *C.elegans* is a sensitive method for specific knockdown of gene expression [Conte et al. 2015], and when ap-  
160 plied to fluorescent transgenes, RNAi provides a robust visual phenotypic readout of the degree of knockdown at  
161 a cellular level. In *C.elegans*, RNAi-mediated silencing can be achieved by feeding worms with *E.coli* express-  
162 ing a gene-specific dsRNA [Timmons and Fire 1998] or via soaking of worms in a highly concentrated solution  
163 of dsRNA ranging from 0.5-5  $\mu\text{g}/\mu\text{L}$  [Ahringer 2006]. Ingested dsRNAs are recognized by the luminal recep-  
164 tor SID-2 and subsequently engulfed [McEwan et al. 2012]. Engulfed dsRNAs are released and spread into the  
165 cell cytosol (and throughout the animal) via SID-1 membrane channels [Wang and Hunter 2017]. The presence  
166 of dsRNA in the cytosol triggers canonical RNA dependent RNA polymerase (RDRP)-based amplification and  
167 ultimately RNAi silencing of target genes [Shih and Hunter 2011]. In order to test the effectiveness of electro-  
168 poration, we utilized this highly sensitive system to identify animals and tissues that were effectively delivered  
169 dsRNAs. To do this, we used transgenic animals BIG0107 that both produce GFP ubiquitously in the nuclei of all  
170 somatic cells and lack the ability to take up dsRNA from the intestine. Synchronized L1 populations of animals  
171 were electroporated using favorable conditions identified above and monitored for *gfp* silencing as a proxy for  
172 effectiveness of dsRNA delivery. Though all treatments with 100 V did not result in silencing, we observed signif-  
173 icant reductions in GFP fluorescence in animals treated with 200 V or greater compared to controls (**Figure 2a**).  
174 Based on phenotypic analyses of the electroporated animals, we identified that treatments of animals with 300 V  
175 for 10 ms yielded the highest percentage of animals in the completely silenced (all but neuronal cells) category at  
176 nearly 60% (**Figure 2b**). Together, these results identified effective conditions that allow the delivery of dsRNAs  
177 into *C.elegans* animals.

178 **Determination of the tissue distribution of dsRNA delivery in *C.elegans*.** With conditions for delivery op-  
179 timized, we next aimed to identify the breadth of tissues that could be effectively electroporated. To test this,  
180 we utilized a similar reporter system together with the BIG0106 mutant defective in systemic RNAi, as SID-1  
181 membrane channels facilitate spread of dsRNAs between tissues and into cells [Whangbo et al. 2017]. In this



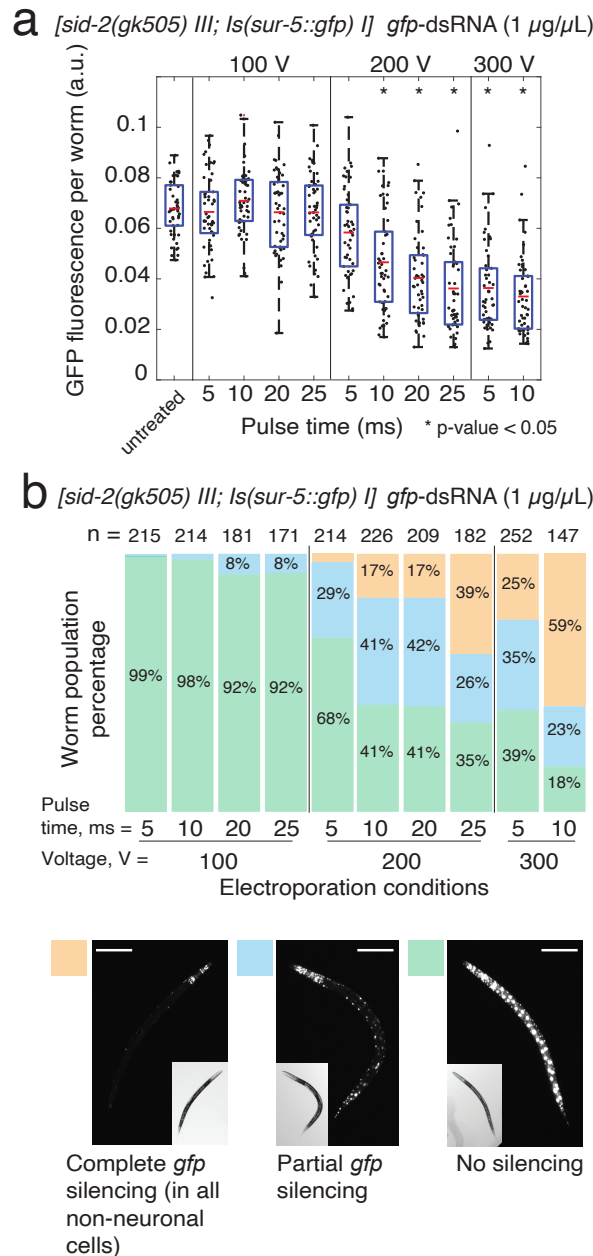

**Figure 2: Identification of electroporation conditions for efficient delivery of dsRNA in *C.elegans*.** To evaluate the effectiveness of nucleic acid delivery into animals, we used highly sensitive RNAi-mediated silencing of a GFP transgene following electroporation of dsRNA. **(a)** Synchronized L1 populations of BIG0107 [*sid-2(gk505) III; ls(sur-5::gfp) I*] worms (~250) were electroporated with *gfp*-dsRNA of 1  $\mu\text{g}/\mu\text{L}$  using favorable electroporation conditions. Animals placed in electroporation buffer without dsRNA or electric discharge were used as "untreated" controls. For each condition, GFP fluorescence intensity of worms (n=50) was measured in arbitrary units (a.u.). Asterisk (\*) indicates groups where significant *gfp* silencing compared to the untreated control was observed (p - value < 0.05, ANOVA test with Bonferroni correction). Red lines indicate means, blue boxes show 25<sup>th</sup> and 75<sup>th</sup> percentiles, whiskers show the data distribution range. **(b)** Three phenotypic categories of animals were scored in each condition group, including worms with "No silencing", "Partial *gfp* silencing", and "Complete *gfp* silencing" (all but neuronal cells). The electroporation parameters of 300 V 10 ms with the highest percentage in "Complete *gfp* silencing" category (59%) were chosen as the most efficient. n = number of worms scored. Representative images of worms from each category are shown, scale bar = 100  $\mu\text{m}$ .

182 manner, *gfp* silencing should only be observed in those tissues and cells where *gfp*-dsRNA was directly delivered  
183 into the cell cytoplasm. Loss of systemic RNAi in these mutants predictably reduced the overall level of *gfp* si-  
184 lencing (**Figure 3**). Microscopic assessment of the animals indicated that silencing within hypodermal cells likely  
185 accounted for the majority of the significant decreases of GFP expression observed in *sid-1* mutants compared  
186 to controls (**Figure 3a-b, d**). These results do not exclude the possibility of delivery to other tissues, but suggest  
187 that the degree of delivery may be less efficient and would require additional optimization for silencing to occur.  
188 The presence of a large proportion of worms with partial *gfp* silencing (**Figure 2**) also suggests that the impact  
189 of the electric pulse along the animal body may not be uniform and depends on worm position in the cuvette that  
190 could lead to observed *gfp* silencing variations both between and within animals. Together these results indicate  
191 that electroporation delivers *gfp*-dsRNA most efficiently to hypodermal cells and then spreads to other tissues in  
192 a SID-1-dependent manner (**Figure 3c, e**).

193 **Dose dependent delivery of dsRNA by electroporation.** RNAi mediated silencing in *C.elegans* occurs in a  
194 dose dependent manner [Whangbo et al. 2017], which can be particularly useful when testing functions of es-  
195 sential genes. Since the experiments outlined above utilized highly concentrated levels of dsRNA (1  $\mu\text{g}/\mu\text{L}$ ), we  
196 next sought to identify whether we could control degree of silencing by titrating the levels of dsRNA targeting  
197 native genes delivered to the VC1119 animals. To test this, we selected two native genes expressed in the hy-  
198 podermis with readily quantifiable size-based phenotypes, *nhr-23* (developmental arrest [Kouns et al. 2011]) and  
199 *dpy-13* (dumpy [von Mende et al. 1988]), to trigger silencing by different levels of dsRNA concentration (10  $\text{ng}/\mu\text{L}$ ,  
200 100  $\text{ng}/\mu\text{L}$  and 1  $\mu\text{g}/\mu\text{L}$ ). For each gene, we observed dose dependent, electroporation-driven ranges in silencing  
201 depending on the amount of dsRNA in solution (**Figure 4a,d**). Notably though, 100 fold less concentrated *nhr*-  
202 *23*-dsRNA was able to cause developmental arrests in 70% of animals compared to 96% for animals treated with  
203 1  $\mu\text{g}/\mu\text{L}$  of *nhr-23*-dsRNA (**Figure 4b-c**). While for *dpy-13*, we observed a lower penetrance of the dumpy phe-  
204 notype and more gradual decrease in the average worm size with the increase of *dpy-13*-dsRNA concentration  
205 (**Figure 4d-f**). Together, these results illustrate that electroporation of dsRNA can titrate levels of gene silencing  
206 with minimal levels of starting dsRNA material.

207 **Germline delivery and transmission of electroporated dsRNA to progeny.** Next we aimed to examine  
208 whether electroporation could be used to deliver material to the germline of animals. We expected the most  
209 efficient transmission of dsRNAs to occur in animals that are at or near reproductive maturity (i.e., L4 stage or  
210 older [Marra et al. 2016]). To test whether dsRNA can target the germline, populations of L4 animals VC1119  
211 were electroporated with a germline-specific *pos-1*-dsRNA of 1  $\mu\text{g}/\mu\text{L}$  (**Figure 5a**), as efficient silencing of the  
212 *pos-1* gene produces a robust embryonic lethal phenotype [Tabara et al. 1998]. After 24 hrs adult animals were  
213 removed from the plate and the progeny were scored for hatching after an additional 48 hrs. We observed consis-  
214 tent delivery and efficient *pos-1* silencing as evidenced by the prevalence of unhatched eggs from electroporated  
215 animals compared to those of untreated control animals (**Figure 5b**). This indicates that the hypodermally deliv-

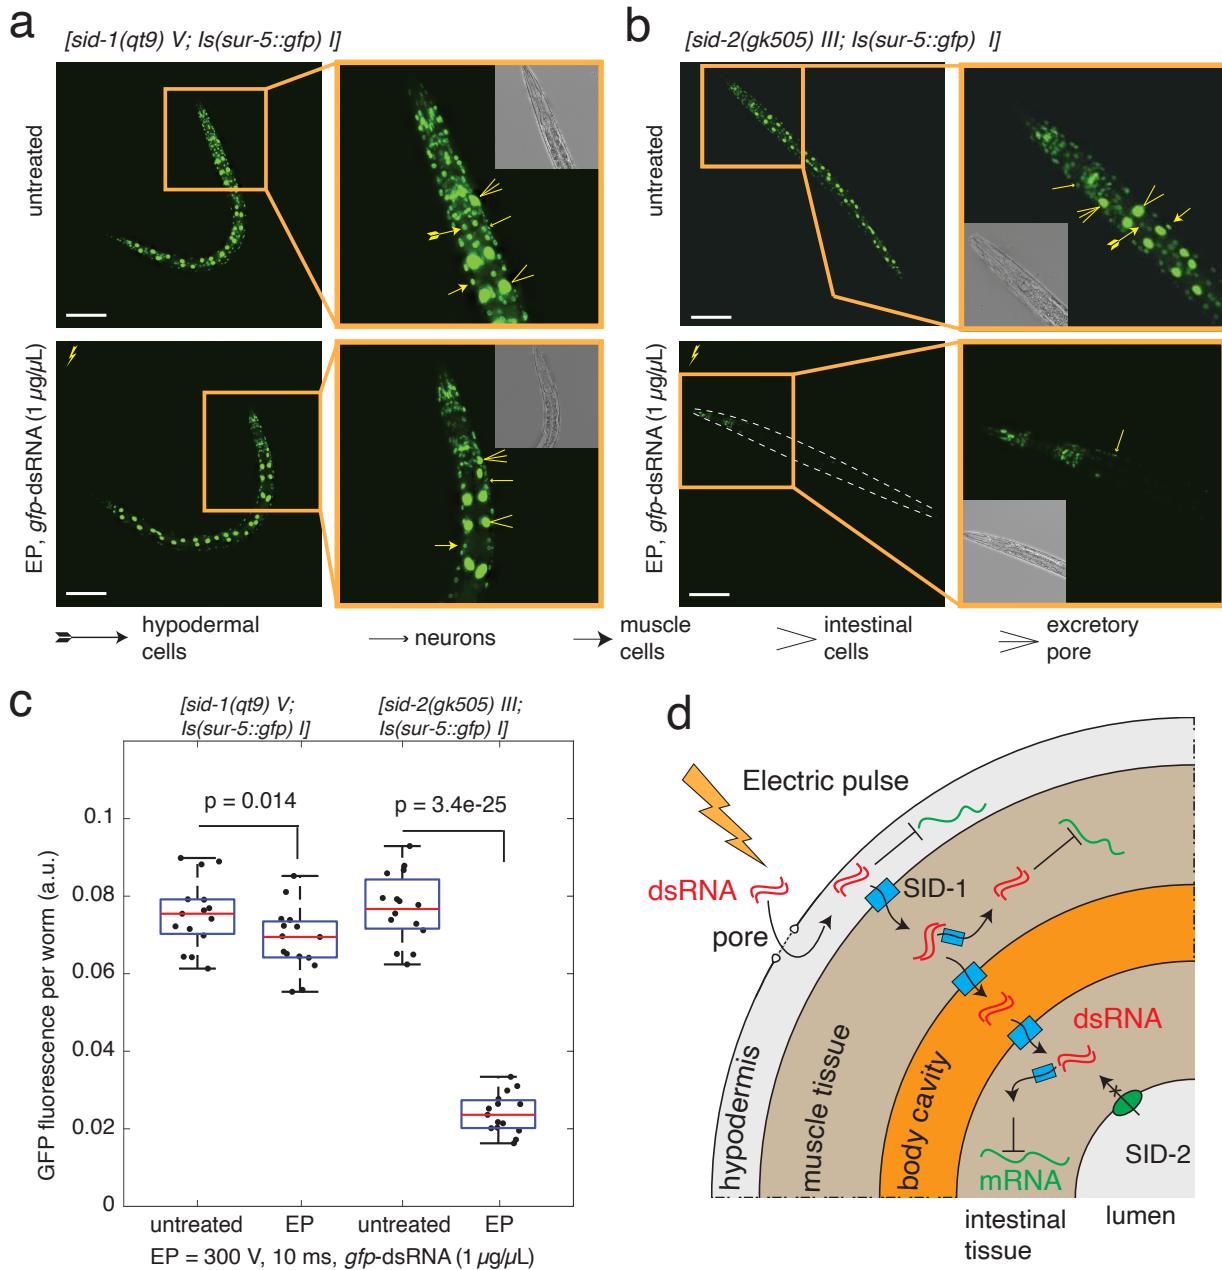

**Figure 3: Evaluation of tissue distribution of RNAi silencing in electroporated animals.** (a, b) Representative images of BIG0106 *[sid-1(qt9) V; ls(sur-5::gfp) I]* and BIG0107 *[sid-2(gk505) III; ls(sur-5::gfp) I]* worms were taken 48 hrs after the electroporation of L1 worm populations with *gfp-dsRNA* of 1  $\mu\text{g}/\mu\text{L}$  using 300 V 10 ms conditions. Images of "untreated" control animals (no electroporation, no dsRNA) are presented for comparison. Scale bar = 100  $\mu\text{m}$ . (c) Levels of GFP fluorescence in both worm strains ( $n=15$ ) after electroporation were compared to the untreated controls (P-values are noted, ANOVA test with Bonferroni correction). No significant differences in GFP fluorescence between untreated control worms from each strain were found. Red lines indicate means, blue boxes show 25<sup>th</sup> and 75<sup>th</sup> percentiles, whiskers show the data distribution range. (d) Schematic of the presumed routes of dsRNA transport highlighting hypodermal entry as a primary site of initial dsRNA delivery by electroporation, followed by spread to other tissues in a SID-1-dependent manner.

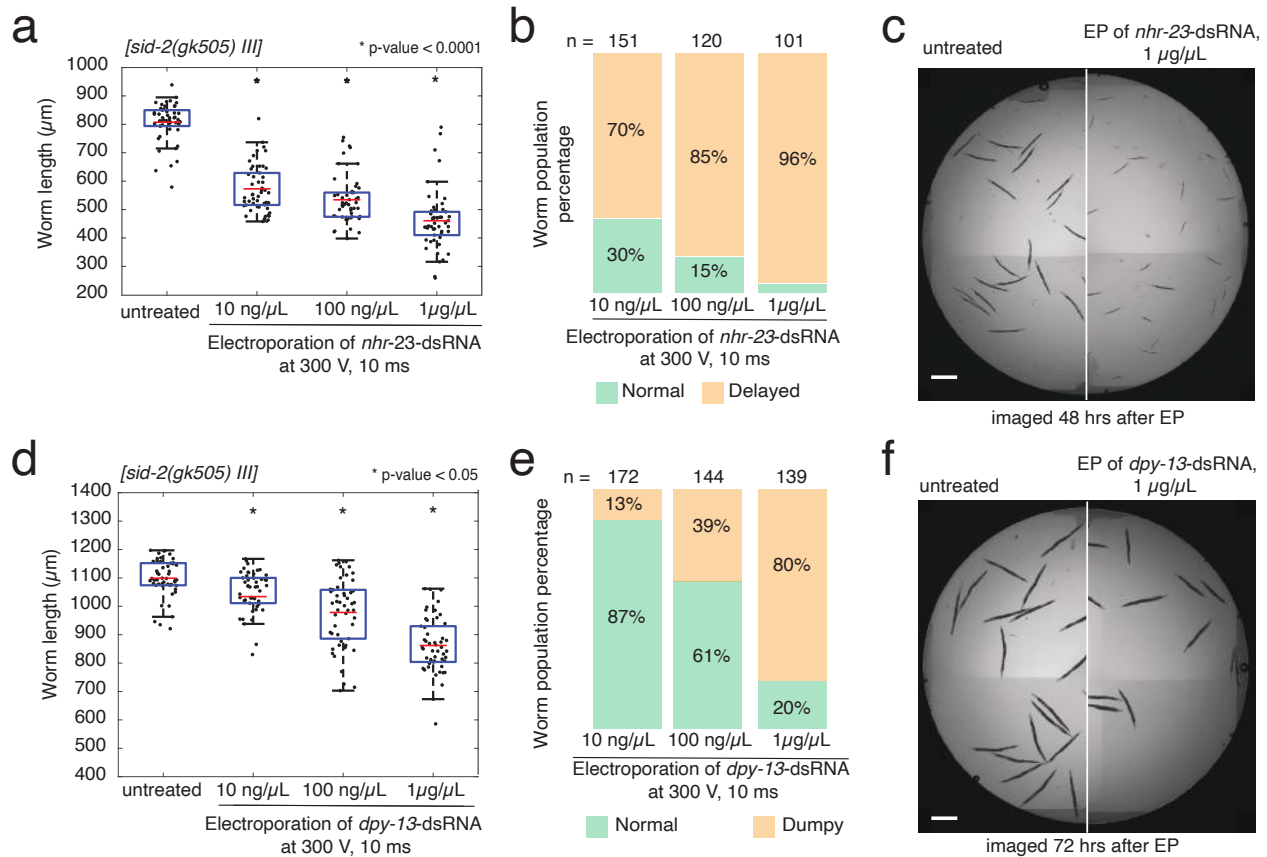

**Figure 4: Efficiency of electroporation-driven gene silencing of endogenous genes is dose dependent.** In order to test the effectiveness in non-transgenic animals, we targeted endogenous hypodermally expressed genes with robust RNAi phenotypes, *nhr-23* (larval arrest, (a,b,c) ) and *dpy-13* (shortened body size, (d,e,f)). (a) Impact of electroporation of *nhr-23*-dsRNA on the development of *sid-2(gk505)* worms treated at L1 stage and imaged after 48 hrs. Red lines indicate means, blue boxes show 25<sup>th</sup> and 75<sup>th</sup> percentiles, whiskers show the data distribution range. (b) Proportion of animals scored as having either "normal" or "delayed" development after electroporation. (c) Representative image of worms show the *nhr-23* silencing effect at 1  $\mu\text{g}/\mu\text{L}$  of dsRNA (right image), when compared to untreated worms (left image). Scale bar = 500  $\mu\text{m}$ . (d) Impact of electroporation of *dpy-13*-dsRNA on body size of *sid-2(gk505)* worms treated at L1 stage and imaged after 72 hrs. Red lines indicate means, blue boxes show 25<sup>th</sup> and 75<sup>th</sup> percentiles, whiskers show the data distribution range. (e) Proportion of animals scored as "normal" or "dumpy" after electroporation. (f) Representative images of worms demonstrate the *dpy-13* silencing at 1  $\mu\text{g}/\mu\text{L}$  of dsRNA (right image) in comparison with untreated control worms (left image). Scale bar = 500  $\mu\text{m}$ . Asterisk (\*) indicates groups with significant gene silencing compared to the untreated control (p - value < 0.05, ANOVA test with Bonferroni correction).

216 ered dsRNA can spread and silence effectively in the germline, which we are not able to observe with *sur-5::gfp*  
 217 strains due to intrinsic germline silencing of *gfp* transgenes. Additionally, we also tested *sid-1(qt9)* mutants defec-  
 218 tive in systemic RNAi and observed no difference in progeny development derived from electroporated population  
 219 of worms compared to the control worms (Figure 5b). Together, these studies indicate transmission of electro-  
 220 plated dsRNA to the germlines.

221 **Evaluation of electroporation to deliver guide RNA to germlines for Cas9-mediated genome editing.** Since  
 222 we demonstrated that we could deliver dsRNAs to the germline, we sought to next determine whether that de-

223 livery could be extended to guide RNAs (gRNAs) for CRISPR/Cas9 based genome editing. Typically, gRNAs  
224 are injected along with additional components into the germlines of animals one-by-one to target disruption of  
225 specific genes [Prior et al. 2017]. In this study, we took advantage of transgenic worms stably expressing *cas9*  
226 in the germline (EG9888 [*W01A8.6(oxTi—[Pmex-5::cas9(+ smu-2 introns), Phsp-16.41::Cre, Pmyo-2::2xNLS-*  
227 *CyOFP + lox2272]*]); unpublished, a gift from Dr. Matthew Schwartz and Dr. Erik Jorgensen) that should only  
228 need introduction of gRNAs to facilitate targeting. We then chose to deliver a well characterized and robust gRNA  
229 targeting *dpy-10* that is commonly used as a co-CRISPR marker for CRISPR/Cas9 editing during microinjection  
230 [Arribere 2014]. In order to ensure robust Cas9 production, we electroporated *dpy-10*-gRNA (1  $\mu\text{g}/\mu\text{L}$ ; 300 V and  
231 10 ms) into a population of young adult (YA) worms and screened F1 progeny for editing events both phenotyp-  
232 ically and genetically (**Figure 5c**). As additional controls, we included both soaking in *dpy-10*-gRNA (1  $\mu\text{g}/\mu\text{L}$ )  
233 and feeding on *E.coli* producing *dpy-10*-gRNA; neither of these controls produced phenotypically altered progeny.  
234 Electroporated *dpy-10*-gRNA was able to be successfully delivered in population of P0 worms (n = 52), and albeit  
235 at low levels resulted in F1 progeny production with Rol (n = 25) and Dpy (n = 13) phenotypes (**Figure 5d; File**  
236 **S2**). However, the observed phenotypic changes were not heritable or lethal and more likely were only somatic in  
237 F1 animals, as F2 progeny did not retain their phenotypes. Consistent with this notion, Illumina sequencing of F1  
238 Rol and Dpy animals identified low indels frequency rates ranging from 0.2% - 1.3% with single and dinucleotide  
239 deletions (**Figure 5e**). Worth noting, in order to confirm functionality of *in-vitro* produced gRNA, EG9888 animals  
240 were injected with *dpy-10*-gRNA followed by F1 progeny selection with Rol and Dpy phenotypes. Subsequently,  
241 F2 progeny from these animals was also genotypically confirmed to inherit Rol and Dpy phenotypes (data not  
242 shown). Together, these results suggest that electroporation-based delivery of gRNAs is possible, but further  
243 optimization is needed to increase the efficiency of targeting moving forward.

## 244 DISCUSSION

245 We demonstrate that nucleic acids can be delivered via electroporation into *C.elegans* worms at several stages of  
246 life. Electroporation conditions were optimized to maximize animal viability and potential for material delivery. Us-  
247 ing RNAi as a sensitive readout for delivery of dsRNA, we show that electroporation-mediated delivery of *in-vitro*  
248 synthesized gene-specific dsRNAs resulted in RNAi silencing of both GFP-reporter transgenes and native genes,  
249 such as *nhr-23*, *dpy-13*, *pos-1*. Dose-dependent increase in electroporation-driven RNAi silencing was demon-  
250 strated with dsRNA concentrations ranging from 10  $\text{ng}/\mu\text{L}$  to 1  $\mu\text{g}/\mu\text{L}$ . The use of *sid-1(qt9)* and *sid-2(gk505)*  
251 mutants with *sur-5::gfp* transgene reporter allowed us to dissect the way electroporated dsRNA enters inside the  
252 worm body. Namely, electroporated dsRNA is delivered into the cytoplasm of hypodermal cells and distributed  
253 systemically by SID-1 RNA channel throughout the body and into germlines (**Figure 3d**). The proposed elec-  
254 troporation method of population scale dsRNA delivery is quick, easy and can be accomplished in 15 minutes  
255 compared to traditional 24-48 hours needed for efficient RNAi by feeding and soaking [Ahringer 2006].

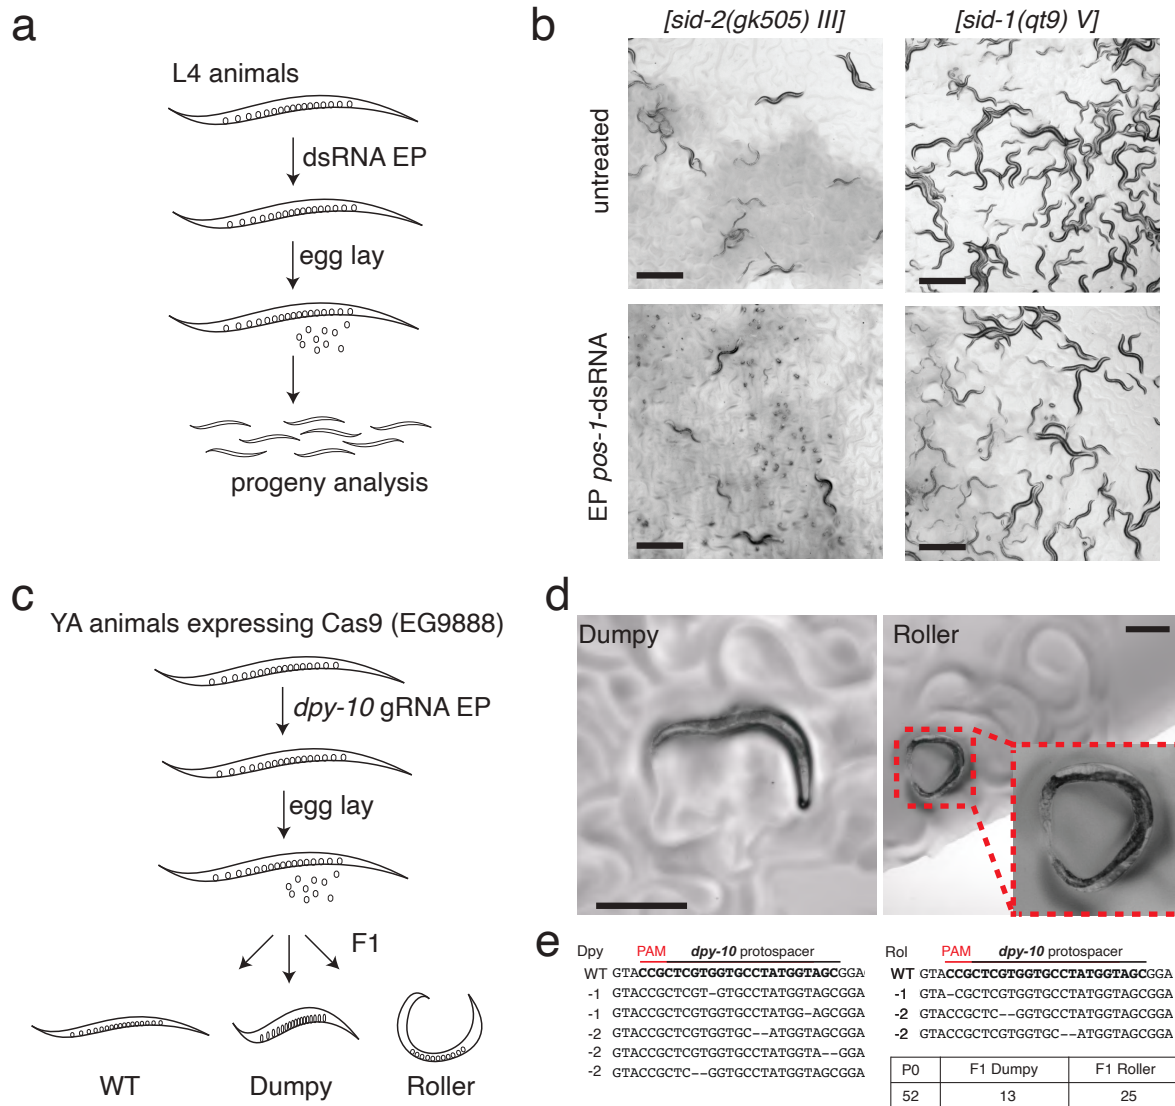

**Figure 5: Evaluation of electroporation for delivery to the animal germline and progeny.** To further test the utility of this approach, we sought to identify whether we could, first, stimulate RNAi knockdown of endogenous gene *pos-1* expressed in germline with robust phenotype (embryonic lethality) and, second, deliver guide RNA (gRNA) for CRISPR/Cas9-mediated genome editing of the endogenous *dpy-10* gene. **(a)** Schematic of *pos-1*-dsRNA delivery to L4 worms by electroporation (300 V for 10 ms, 1  $\mu\text{g}/\mu\text{L}$  of dsRNA in electroporation buffer with final volume of 50  $\mu\text{L}$ ) followed by phenotypic analysis of progeny. Animals were allowed to lay eggs for 24 hrs, removed from the lawn, and the proportion of hatched progeny was determined after 48 hrs. **(b)** Representative images of effective electroporation-mediated delivery of *pos-1*-dsRNA to *sid-2(gk505)* animals. Scale bar = 500  $\mu\text{m}$ . **(c)** Schematic of delivery of *dpy-10* gRNA to Young Adult (YA) animals by electroporation (300 V for 10 ms, 1  $\mu\text{g}/\mu\text{L}$  of RNA in electroporation buffer with final volume of 50  $\mu\text{L}$ ) followed by phenotypic screening of progeny for evidence of genome editing (Dumpy or Roller). **(d)** Representative images of successful electroporation of *dpy-10* gRNA in EG9888 animals that resulted in F1 progeny with visible Rol and Dpy phenotypes. Scale bar = 300  $\mu\text{m}$ . **(e)** Illumina sequencing-based confirmation of Cas9-mediated mutations.

256 Being able to pair host genetic knockdowns that do not require alterations in the physiology of the animal are  
257 key to the usefulness of the system regardless of the question being interrogated. Studies of *C.elegans* commonly  
258 rely on standard *E.coli* OP50 diet in the laboratory and on RNAi screenings where the other *E.coli* strain HT115

259 is used both as a diet source and a producer of dsRNA. It was found that these two *E.coli* strains differentially  
260 affect gene expression profiles in worms [Coolon et al. 2009] and influence on animal metabolism, physiology,  
261 development, behavior, immunity, and lifespan. For this reason, recent advances have led to the development of  
262 an *E.coli* OP50 RNAi strain [Neve et al. 2020]. However, expanded appreciation for and widespread utilization of  
263 microbes from *C.elegans* natural microbiome [Zhang et al. 2017], each with their own impact on aspects of host  
264 physiology [Samuel et al. 2016], complicates this paradigm. Each strain would need its own RNAi library in order  
265 to properly examine the genetics of host-microbe interactions in these cases. Thus, we believe that electropora-  
266 tion as a bacteria-free dsRNA delivery method can mitigate the need to introduce another microbe into the mix  
267 (*E.coli*) in RNAi-based tests of host-microbe interactions. In addition, compared to RNAi silencing implemented  
268 via soaking, which is also a bacteria-free method, electroporation eliminates prolonged worm starvation or lar-  
269 val developmental arrest, which also has a pronounced effect on worm gene expression profiles particularly if  
270 completed early in life [Rechavi et al. 2014].

271 Beyond knockdowns, many effective strategies have been developed for precise genome editing of *C.elegans*  
272 [Dickinson and Goldstein 2016, Wang et al. 2018, Schwartz and Jorgensen, Au et al. 2019, Yang et al. 2020].  
273 Nearly all of these strategies rely on low-throughput microinjection methods for delivery of nucleic acids mixtures.  
274 Here, we present proof-of-principle studies that electroporation may be a useful strategy for circumventing the  
275 microinjection step in these pipelines through population-scale delivery of guide RNAs in Cas9 expressing trans-  
276 genic worms. We observed the Rol and Dpy phenotypes after electroporation of young adult worms with *dpy-10*  
277 gRNA only in the F1 generation, suggesting that phenotypes were presumably caused by editing in somatic cells.  
278 Further studies will be needed to determine whether this is due to the delivery route that the electroporated gRNA  
279 reached the germline, which is likely SID-1 dependent spreading from hypodermal cells in this case. Somatic  
280 editing in F1 generation of worms after microinjections of CRISPR/Cas9 complex in worm's syncytial gonads is  
281 commonly observed and is a consequence of residual Cas9 activity in the fertilized embryos [Cho et al. 2013].  
282 This explanation fits well to our experimental results given that in EG9888 transgenic strain Cas9 is expressed  
283 under cytoplasmic germline *mex-5* promoter which remains active in fertilized eggs as well [Tenlen et al. 2008].  
284 Additionally, previous studies have demonstrated that transportation of dsRNA to proximal oocytes and embryos  
285 in mature worms also occurs via RME-2 mediated endocytosis [Marra et al. 2016]. It may be possible to engage  
286 this pathway for more efficient and timely transfer of gRNAs to the germline. Overall, we believe that our findings  
287 hold a promise for further development of population scale, electroporation-mediated delivery of nucleic acids  
288 into *C.elegans* for a wide variety of applications.

## 289 ACKNOWLEDGEMENTS

290 This work was supported by an NIH New Innovator Award DP2DK116645 (to B.S.S) and pilot funding from the  
291 Dunn Foundation (to B.S.S.). Some strains were provided by the CGC, which is funded by NIH Office of Research

292 Infrastructure Programs (P40 OD010440). We are grateful to the Gary Ruvkun, Craig Hunter and Erik Jorgensen  
293 laboratories for sharing *C.elegans* strains. We also thank members of the Robert Britton, Gretchen Diehl, David  
294 Reiner and Zheng Zhou laboratories for use of key equipment, support and advice, and members of the Samuel  
295 lab for helpful comments on the manuscript.



## REFERENCES

- 296 [Corsi et al. 2015] Corsi ,A.K., Wightman, B., Chalfie, M., 2015 A Transparent Window into Biology: A Primer on *Caenorhabditis elegans*. *Genetics* 200(2):  
297 387-407.
- 298 [Meneely et al. 2019] Meneely, P.M., Dahlberg, C.L., Rose, J.K., 2019 Working with Worms: *Caenorhabditis elegans* as a Model Organism. *Curr. Protoc.*  
299 *Ess. Lab. Tech. V. 19, 1:e35.*
- 300 [Housden et al. 2017] Housden, B.E., Matthias Muhar, M., Gemberling, M., Gersbach, C.A., Stainieret, D.Y.R. et al. 2017 Loss-of-function genetic tools  
301 for animal models: cross-species and cross-platform differences. *Nat. Rev. Genet.* 18, 2440.
- 302 [Timmons and Fire 1998] Timmons, L., Fire, A., 1998 Specific interference by ingested dsRNA. *Nature* 395:854.
- 303 [Conte et al. 2015] Conte, D., Jr., MacNeil, L.T., Walhout, A.J.M., Mello, C.C., 2015 RNA Interference in *Caenorhabditis Elegans*. *Curr. Protoc. Mol. Biol.*  
304 109: 26.3.126.3.30.
- 305 [Berkowitz et al. 2008] Berkowitz, L.A., Knight, A.L., Caldwell, G.A., Caldwell, K.A., 2008 Generation of stable transgenic *C. elegans* using microinjection.  
306 *J. Vis. Exp.* 18:833.
- 307 [Dickinson and Goldstein 2016] Dickinson, D.J., Goldstein, B., 2016 CRISPR-Based Methods for *Caenorhabditis elegans* Genome Engineering. *Genetics*  
308 202(3): 885901.
- 309 [Alsaggar and Liu 2015] Alsaggar, M., Liu, D. 2015 Physical Methods for Gene Transfer. *Adv. Genet.* 89:124.
- 310 [Young and Dean 2015] Young J.L., Dean, D.A., 2015 Electroporation-Mediated Gene Delivery. *Adv Genet.* 89: 4988.
- 311 [Kera et al. 2010] Kera, S.A., Agerwala, S.M., Horne, J.H. 2010 The Temporal Resolution of In Vivo Electroporation in Zebrafish: A Method for Time-  
312 Resolved Loss of Function. *Zebrafish* 7(1): 97108.
- 313 [Haas et al. 2002] Haas, K., Jensen, K., Sin, W.C., Foa, L., Cline, H.T. et al. 2002 Targeted electroporation in *Xenopus* tadpoles in vivo from single cells  
314 to the entire brain. *Differentiation* 70 (45): 148-154.
- 315 [Ando and Fujiwara 2013] Ando, T., Fujiwara, H. 2013 Electroporation-mediated somatic transgenesis for rapid functional analysis in insects. *Development*  
316 140: 454-458.
- 317 [Whangbo et al. 2017] Whangbo, J.S., Weisman, A.S., Chae, J., Hunter, C.P. 2017 SID-1 Domains Important for dsRNA Import in *Caenorhabditis elegans*.  
318 *G3* 7 (12): 3887-3899.
- 319 [Ahringer 2006] Ahringer, J., ed. Reverse genetics (April 6, 2006), WormBook, ed. The *C. elegans* Research Community, WormBook,  
320 doi/10.1895/wormbook.1.47.1, <http://www.wormbook.org>.
- 321 [McEwan et al. 2012] McEwan, D.L., Weisman, A.S., Hunter, C.P. 2012 Uptake of extracellular double-stranded RNA by SID-2. *Mol Cell.* 47(5):746-54.
- 322 [Shih and Hunter 2011] Shih, J.D., Hunter, C.P. 2011 SID-1 is a dsRNA-selective dsRNA-gated channel. *RNA* 17(6):1057-1065.
- 323 [Wang and Hunter 2017] Wang, E., Hunter, C.P. 2017 SID-1 Functions in Multiple Roles To Support Parental RNAi in *Caenorhabditis elegans*. *Genetics*  
324 207(2): 547557.
- 325 [Marra et al. 2016] Marra, J., Travera, E.C., Josea, A.M. 2016 Extracellular RNA is transported from one generation to the next in *Caenorhabditis elegans*.  
326 *PNAS* 113 (44):1249612501.
- 327 [Tabara et al. 1998] Tabara, H., Grishok, A., Mello, C.C. 1998 RNAi in *C. elegans*: soaking in the genome sequence. *Science* 282(5388):430-1.
- 328 [Arribere 2014] Arribere, J.A., Bell, R.T., Fu, B.X.H., Artilles, K.L., Hartman P.S. et al. 2014 Efficient Marker-Free Recovery of Custom Genetic Modifications  
329 with CRISPR/Cas9 in *Caenorhabditis elegans*. *Genetics* 198(3): 837846.
- 330 [Hwang et al. 2013] Hwang, W.Y., Fu, Y., Reyon, D., Maeder M.L., Tsai S.Q. et.al 2013 Efficient genome editing in zebrafish using a CRISPR-Cas system.  
331 *Nat Biotechnol.* 31: 227229.
- 332 [Addgene plasmid 42250] Addgene plasmid # 42250 ; <http://n2t.net/addgene:42250> ; RRID:Addgene42250
- 333 [Schindelin et al. 2012] Schindelin, J., Arganda-Carreras, I., Frise, E. et al. 2012 Fiji: an open-source platform for biological-image analysis. *Nat Methods*  
334 9: 676682.
- 335 [Park 2017] Park J. et al. 2017 Cas-Analyzer: an online tool for assessing genome editing results using NGS data. *Bioinformatics* 33: 286-288.
- 336 [Wang et al. 2018] Wang, H., Park, H., Liu, J, Sternberg, P.W. 2018 An Efficient Genome Editing Strategy To Generate Putative Null Mutants in *Caenorhab-*  
337 *ditis elegans* Using CRISPR/Cas9. *G3* 8(11): 3607-3616.
- 338 [Cho et al. 2013] Cho, S.W., Lee, J., Carroll, D., Kim, J., Lee, J. 2013 Heritable Gene Knockout in *Caenorhabditis elegans* by Direct Injection of  
339 Cas9-sgRNA Ribonucleoproteins. *Genetics* 195(3):1177-1180.
- 340 [Zhang et al. 2017] Zhang F., Berg M., Dierking K., Felix M-A., Shapira M., Samuel B.S., Schulenburg H. 2017 *Caenorhabditis elegans* as a Model for  
341 Microbiome Research. *Front. Microbiol.* 8(485).

- 342 [Stiernagle 2006] Stiernagle, T. 2006. Maintenance of *C. elegans*. WormBook, ed. The *C. elegans* Research Community, WormBook,  
343 doi/10.1895/wormbook.1.101.1, <http://www.wormbook.org>.
- 344 [Kouns et al. 2011] Kouns N.A., J. Nakielna, F. Behensky, M. W. Krause, Z. Kostrouch, M. Kostrouchovaa. 2011 NHR-23 dependent collagen and  
345 hedgehog-related genes required for molting. *Biochem Biophys Res Commun.* 413(4): 515-520.
- 346 [von Mende et al. 1988] von Mende N, Bird DM, Albert PS, Riddle DL. 1988 dpy-13: a nematode collagen gene that affects body shape. *Cell* 55(4):567-76.
- 347 [Prior et al. 2017] Prior H., A.K. Jawad, L. MacConnachie, A. A. Beg. 2017 Highly Efficient, Rapid and Co-CRISPR-Independent Genome Editing in  
348 *Caenorhabditis elegans*. *G3* 7(11):3693-3698.
- 349 [Coolon et al. 2009] Coolon JD, Jones KL, Todd TC, Carr BC, Herman MA 2009 *Caenorhabditis elegans* Genomic Response to Soil Bacteria Predicts  
350 Environment-Specific Genetic Effects on Life History Traits. *PLoS Genet* 5(6): e1000503.
- 351 [Neve et al. 2020] Neve I.A.A, J.N. Sowa, C. J. Lin, P. Sivaramakrishnan, C. Herman, Y. Ye, L. Han, M. C. Wang. 2020 *Escherichia coli* Metabolite Profiling  
352 Leads to the Development of an RNA Interference Strain for *Caenorhabditis elegans*. *G3* 10(1):189-198.
- 353 [Rechavi et al. 2014] Rechavi O., L. Hourri-Zeevi, S. Anava, W. S. S. Goh, S. Y. Kerk, G. J. Hannon, O. Hobert. 2014 Starvation-Induced Transgenerational  
354 Inheritance of Small RNAs in *C. elegans*. *Cell* 158(2):277-287.
- 355 [Samuel et al. 2016] Samuel B.S., H. Rowedder, C. Braendle, M-A. Felix, G. Ruvkun. 2016 *Caenorhabditis elegans* responses to bacteria from its natural  
356 habitats. *PNAS* 113 (27) E3941-E3949.
- 357 [Tenlen et al. 2008] Tenlen J.R., J. N. Molk, N. London, B. D. Page, J. R. Priess. 2008 MEX-5 asymmetry in one-cell *C. elegans* embryos requires PAR-4-  
358 and PAR-1-dependent phosphorylation. *Development* 135: 3665-3675.
- 359 [Schwartz and Jorgensen] Schwartz M.L., E. M. Jorgensen. 2016 SapTrap, a Toolkit for High-Throughput CRISPR/Cas9 Gene Modification in *Caenorhab-*  
360 *ditis elegans*. *Genetics* 202(4):1277-1288.
- 361 [Au et al. 2019] Au V., E. Li-Leger, G. Raymant, S. Flibotte, G. Chen et al. 2019 CRISPR/Cas9 Methodology for the Generation of Knockout Deletions in  
362 *Caenorhabditis elegans*. *G3* 9(1):135-144
- 363 [Yang et al. 2020] Yang B., M. Schwartz, K. McJunkin. 2020 In vivo CRISPR screening for phenotypic targets of the mir-35-42 family in *C. elegans*. *Genes*  
364 & *Dev.* 34:1-12.

365

## SUPPLEMENTARY INFORMATION

366

Supplementary data provided with the manuscript:

**Table S1. Strains used in this study.**

| Strain name | Genotype                                                                                                  | Source                                               |
|-------------|-----------------------------------------------------------------------------------------------------------|------------------------------------------------------|
| N2          |                                                                                                           | Samuel lab stock                                     |
| HC196       | <i>[sid-1(qt9) V]</i>                                                                                     | CGC                                                  |
| VC1119      | <i>[dyf-2\&amp;ZK520.2(gk505) III]</i><br>(named as <i>[sid-2(gk505)III]</i> in text)                     | CGC                                                  |
| GR1403      | <i>[ls(sur-5::gfp) I; eri-1(mg366) IV]</i>                                                                | Gary Ruvkun lab                                      |
| BIG0105     | <i>[ls(sur-5::gfp) I]</i>                                                                                 | this study; generated by crossing GR1403 and N2      |
| BIG0106     | <i>[sid-1(qt9) V; ls(sur-5::gfp) I]</i>                                                                   | this study; generated by crossing BIG0105 and HC196  |
| BIG0107     | <i>[sid-2(gk505) III; ls(sur-5::gfp) I]</i>                                                               | this study; generated by crossing BIG0105 and VC1119 |
| EG9888      | <i>[W01A8.6(oxTi---{Pmex-5::cas9(+ smu-2 introns), Phsp-16.41::Cre, Pmyo-2::2xNLS-CyOFP + lox2272})I]</i> | Eric Jorgensen lab                                   |

**Table S2. Primers used for genotyping of worms.**

| Name           | Sequence (5' -3')         | PCR product size, bp |      |
|----------------|---------------------------|----------------------|------|
|                |                           | WT                   | MUT  |
| sid-1(qt9)_F   | CATCAAACCTGATCGTAACCGTG   | 300                  | 300  |
| sid-1(qt9)_R   | ACAATGTGACGTGGAATTGGGAAA  |                      |      |
| sid-2(gk505)_F | TCTGCGGATTCTCCATAACC      | 1950                 | 1550 |
| sid-2(gk505)_R | GCGGCAGTTCCGTTATATGT      |                      |      |
| dpy-10_F       | CGGTCTTCAAATCGGATTTAGCTTA | 450                  | N/A  |
| dpy-10_R       | TGGTGGCTCACGAACTTG        |                      |      |

**Table S3. Viability of worms (N2) after electroporation at L4 stage.**

| <b>Voltage, V</b> | <b>Pulse time, ms</b> | <b>Initial # worms taken</b> | <b># worms alive in 24 hours</b> | <b>Viability rate, %</b> |
|-------------------|-----------------------|------------------------------|----------------------------------|--------------------------|
| <b>100</b>        | <b>5</b>              | 150                          | 139                              | 93                       |
|                   | <b>10</b>             | 124                          | 112                              | 90                       |
|                   | <b>20</b>             | 168                          | 146                              | 87                       |
|                   | <b>25</b>             | 165                          | 146                              | 88                       |
| <b>200</b>        | <b>5</b>              | 169                          | 160                              | 95                       |
|                   | <b>10</b>             | 286                          | 259                              | 91                       |
|                   | <b>20</b>             | 236                          | 212                              | 90                       |
|                   | <b>25</b>             | 193                          | 177                              | 92                       |
| <b>300</b>        | <b>5</b>              | 266                          | 257                              | 97                       |
|                   | <b>10</b>             | 337                          | 321                              | 95                       |
|                   | <b>20</b>             | 70                           | 51                               | 73                       |
|                   | <b>25</b>             | 121                          | 86                               | 71                       |
| <b>400</b>        | <b>5</b>              | 119                          | 103                              | 87                       |
|                   | <b>10</b>             | 123                          | 91                               | 74                       |
|                   | <b>20</b>             | 90                           | 48                               | 53                       |
|                   | <b>25</b>             | 108                          | 2                                | 2                        |
| <b>Untreated</b>  |                       | 205                          | 175                              | 85                       |

367 • **File S1. Custom Matlab scripts for image analysis.**

368 The file contains two Matlab scripts for image analysis used throughout the research, additional files re-  
369 quired for the scripts (map.mat ; bformatlab folder) and exemplary fluorescent images (in .nd2 format) of  
370 "Control", "Partially silenced" and "Completely silenced" populations of worms after electroporation with  
371 gfp-dsRNA.

372 – Categorical counting script.

373 The script was used to count the number of worms belonging to the following three categories of worms  
374 in population: partial silencing, complete silencing, and no silencing. As an input the script accept .nd2  
375 image files taken on Nikon fluorescent microscope. The file should have resolution of  $6964 \times 6964$  pixels  
376 and two channels (bright field and fluorescence field). During script execution, the script provides user  
377 with hints on what to do during each stage. Briefly, on a bright field image first manually select worms by  
378 mouse clicking, when finished click once inside the square in left upper corner; next go on fluorescent  
379 image and select worms corresponding to one category, by clicking, when finished click once inside the  
380 square in left upper corner, then continue selection of worms from the other category, again when finished  
381 click once inside the square in left upper corner; at the end you will see the number of worm in each of  
382 three categories and a total number of worms. As an output the script generates a table with a number of  
383 worms falling into each category.

384  
385 – Single channel worm selection script.

386 The script was used for measuring average fluorescence intensity of the worm (or multiple worms) selected  
387 on the image. As an input the script accepts .nd2 image files taken on Nikon fluorescent microscope.  
388 The file should have resolution of  $6964 \times 6964$  pixels and two channels (bright field and fluorescence  
389 field). During script execution, the script provides user with hints on what to do during each stage. The  
390 output file of the script is a table containing a number of rows corresponding to the selected worms.  
391 Each row for each particular worm includes the following information: worm area (Column B), average  
392 fluorescence normalized to the worm's area (Column C), average background intensity (Column F) and  
393 average fluorescence intensity with subtracted background intensity (Column H). Average background  
394 intensity is measured on area with no worm. The script also generates a separate folder where the images  
395 for bright field, fluorescent field and binary masks for each worm are saved.

396  
397 • **File S2. Videos of live worms with Dpy and Rol phenotypes.**

398 The file contains three vide files (in .mp4 format). The video files demonstrate representative F1 worms

399 with Dumpy and Roller phenotypes observed after electroporation of *dpy-10* gRNA in the population of  
400 YA EG9888 worms with Cas9 expression in the germline.

401 ● **File S3. Illumina amplicon sequencing data of *dpy-10* loci in Dpy and Rol worms.**

402 The file contains NGS sequencing files (in .fastq.gz format) including:

- 403 – Dumpy\_R1.fastq.gz
- 404 – Dumpy\_R2.fastq.gz
- 405 – Roller\_R1.fastq.gz
- 406 – Roller\_R2.fastq.gz

407 The files are Illumina 2x250 pair-end sequencing datasets of *dpy-10* PCR amplicons obtained from the single  
408 worms with Dumpy and Roller phenotypes.

409

410 ● **File S4. Table with raw data of worm body lengths and GFP fluorescence intensities measurements  
411 after electroporation with dsRNAs**

412 The file contains additional information and raw data including:

- 413 – Table S4.1 (Sheet 1) - raw data Figure 1b; animals viability testing after electroporation at L1 stage  
414 under different electroporation conditions
- 415 – Table S4.2 (Sheet 2) - raw data for Figure 1c ; measurement of lengths of worms after electroporation  
416 at different conditions
- 417 – Table S4.3 (Sheet 3) - raw data for Figure 2a; measurement of GFP fluorescence intensity per worm
- 418 – Table S4.4 (Sheet 4) - raw data for Figure 3c; measurement of GFP fluorescence intensity per worm
- 419 – Table S4.5 (Sheet 5) - raw data for Figure 4a; measurement of lengths of worms after electroporation  
420 at different dsRNA concentrations
- 421 – Table S4.6 (Sheet 6) - raw data for Figure 4d; measurement of lengths of worms after electroporation  
422 at different dsRNA concentrations.
